# Supplementary material for: RNF8 depletion attenuates hepatocellular carcinoma progression by inhibiting epithelial-mesenchymal transition and enhancing drug sensitivity: The role of RNF8 in EMT and drug sensitivity in HCC
Source: PubMed Central journal article supplement (PMC10195149; doi:10.3724/abbs.2023076), 2023-05-06
Supplement: 229supplementary_materials.pdf [file 229supplementary_materials.pdf]

**Supplementary Table S1. Clinical information of HCC patients**

| Patient    | Gender | Pathologic diagnosis | HbsAg |
|------------|--------|----------------------|-------|
| Patient 1  | male   | HCC                  | +     |
| Patient 2  | female | HCC                  | +     |
| Patient 3  | male   | HCC                  | +     |
| Patient 4  | male   | HCC                  | +     |
| Patient 5  | male   | HCC                  | +     |
| Patient 6  | male   | HCC                  | +     |
| Patient 7  | female | HCC                  | +     |
| Patient 8  | male   | HCC                  | +     |
| Patient 9  | male   | HCC                  | +     |
| Patient 10 | male   | HCC                  | +     |
| Patient 11 | male   | HCC                  | +     |
| Patient 12 | male   | HCC                  | +     |
| Patient 13 | male   | HCC                  | +     |
| Patient 14 | male   | HCC                  | +     |
| Patient 15 | male   | HCC                  | +     |
| Patient 16 | male   | HCC                  | +     |
| Patient 17 | male   | HCC                  | +     |

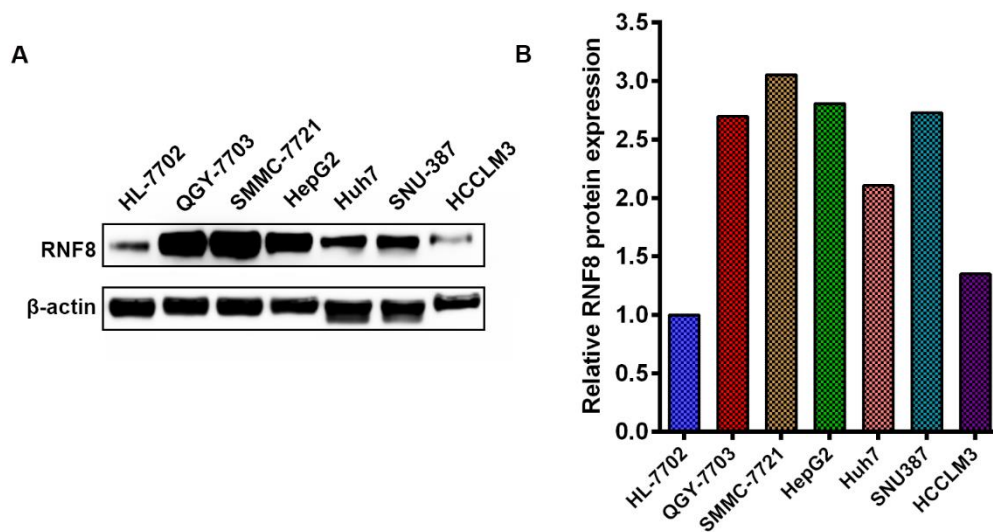

**Supplementary Figure S1. Expression of RNF8 in human normal liver cells and liver cancer cells** Representative western blots (A) and quantification (B) of RNF8 in normal liver and liver cancer cells. The amount of RNF8 expression was normalized by the level of  $\beta$ -actin.

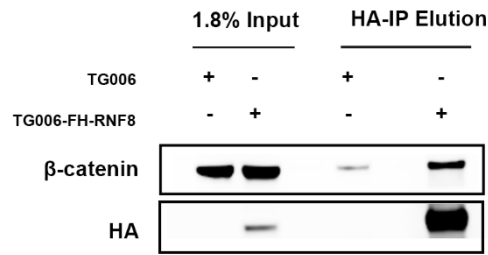

**Supplementary Figure S2. RNF8 directly interacts with endogenous  $\beta$ -catenin** HEK-293T cells were serially transfected with TG006 or TG006-FH-RNF8. The cells were harvested at 48 h posttransfection, the lysates were coimmunoprecipitated with anti-HA-tag agarose beads, and then subjected to western blot analysis with anti-HA (RNF8) and anti- $\beta$ -catenin antibodies.

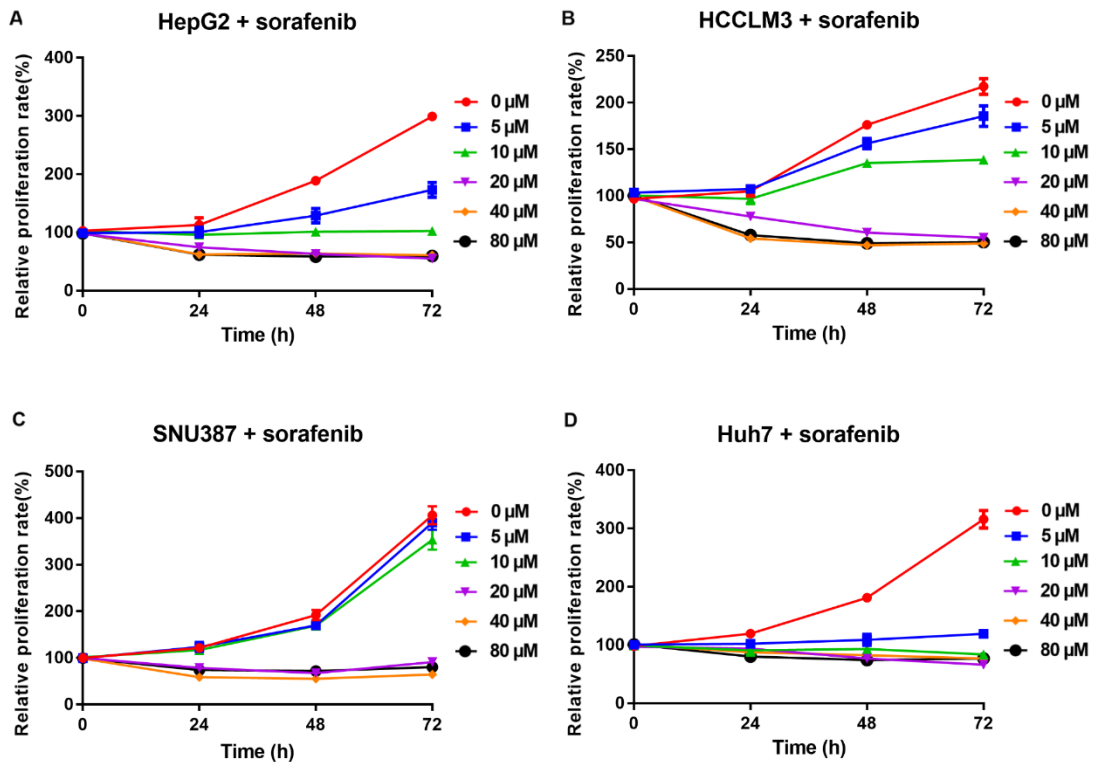

**Supplementary Figure S3. Sorafenib inhibits cell growth of HCC cells** Relative proliferation rate was measured by CCK8 assay in HepG2 (A), HCCLM3 (B), SNU387 (C), and Huh7 (D) cells under sorafenib administration at 24, 48, and 72 h.

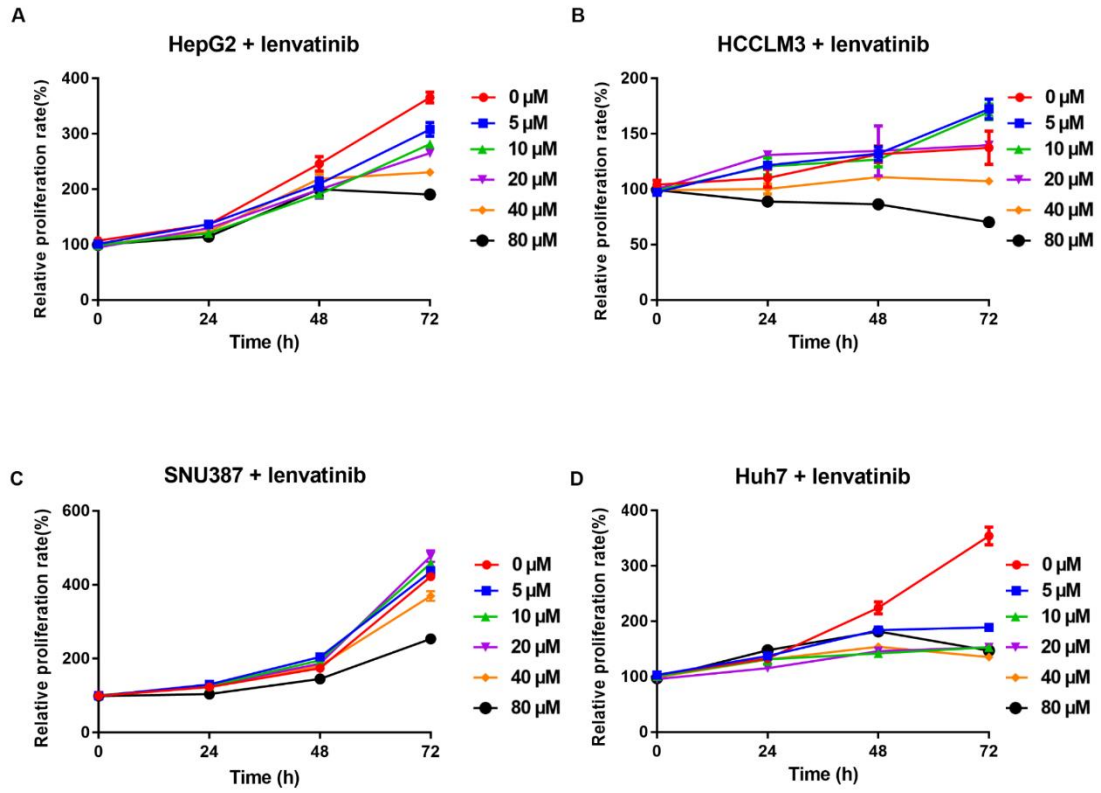

**Supplementary Figure S4. Lenvatinib suppresses proliferation of HCC cells** Relative proliferation rate showing growth of HepG2 (A), HCCLM3 (B), SNU387 (C), Huh7 (D) cells at 24, 48, 72 h after lenvatinib treatment.
